# Supplementary material
Source: PubMed Central journal article supplement (PMC1760733)
Supplement: 147-0706444x1.pdf [file 147-0706444x1.pdf]

## **The glutamate story**

**\*Jeffrey C. Watkins and David E. Jane**

Department of Pharmacology, MRC Centre for Synaptic Plasticity, School of Medical Sciences, University of Bristol, BS8 1TD, UK.

### Supplementary Information

Contents: Eight figures showing the chemical structures of ligands that interact with glutamate receptors. References are given for reviews that contain further information on the pharmacology of these ligands.

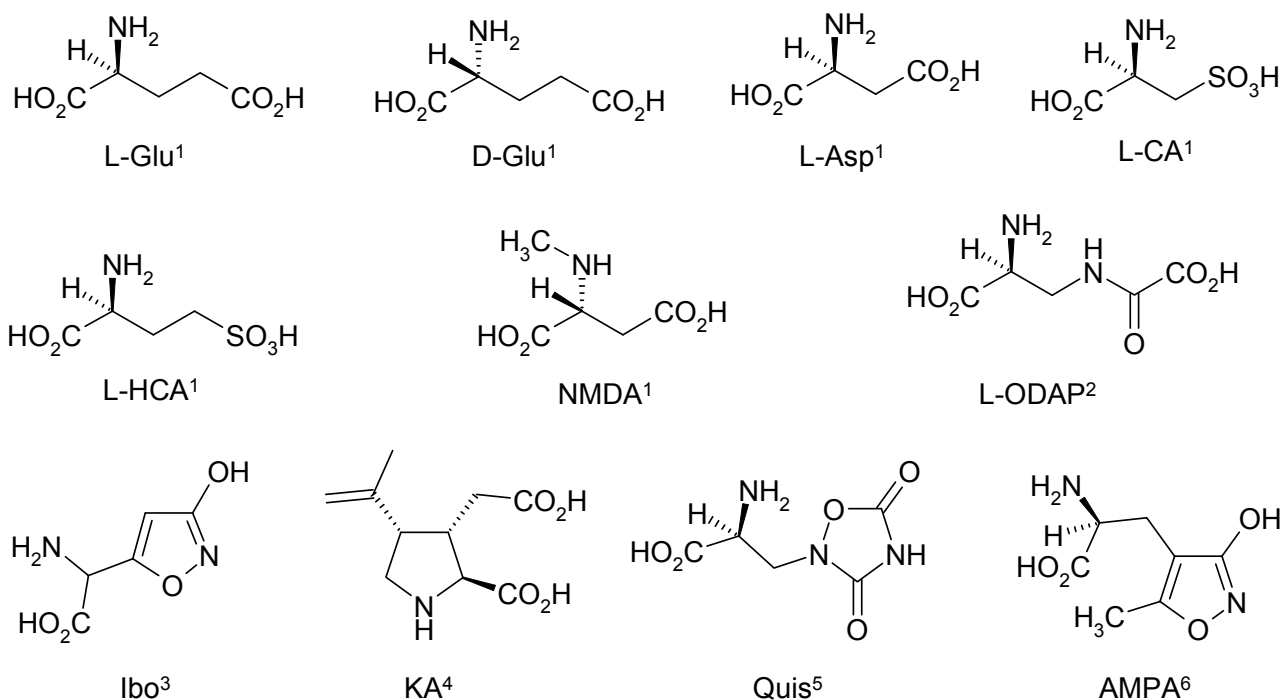

Fig 1. Structures of excitatory amino acids, with dates of first reports. 1, 1959-61; 2, 1965; 3, 1968; 4, 1970; 5, 1974; 6, 1980. See reviews by Curtis and Watkins, 1965; Curtis and Johnson, 1974; Watkins and Evans, 1981. Abbreviations: glu, glutamic acid; asp, aspartic acid; CA, cysteic acid; HCA, homocysteic acid; NMDA, N-methyl-D-aspartic acid; ODAP,  $\beta$ -N-oxalyl- $\alpha,\beta$ -diaminopropionic acid; ibo, ibotenic acid; KA, kainic acid; quis, quisqualic acid; AMPA,  $\alpha$ -amino-3-hydroxy-5-methylisoxazole-4-propionic acid.

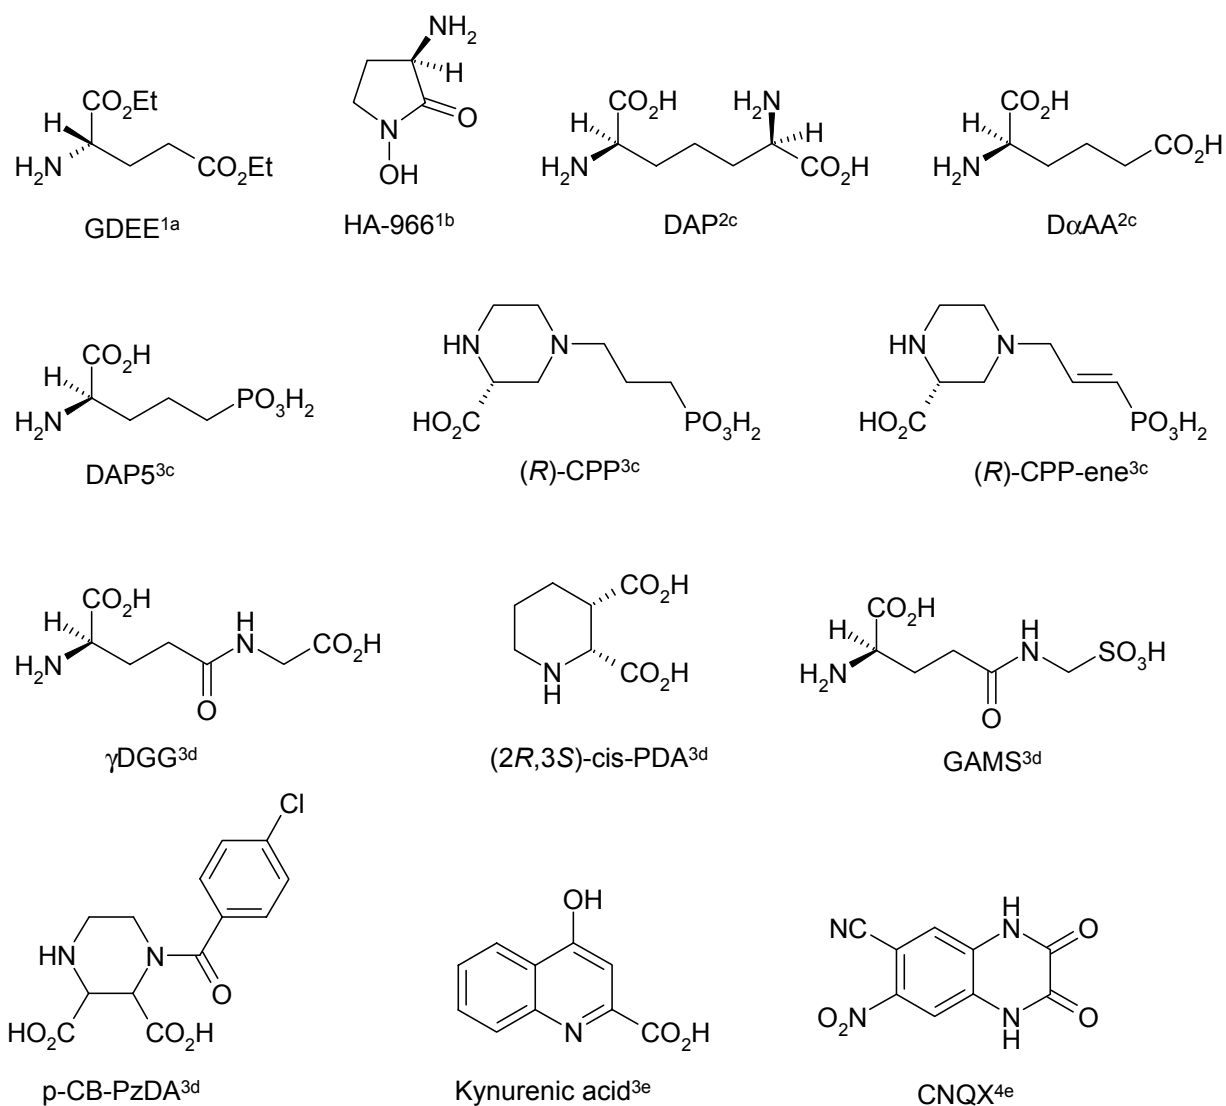

Fig 2. Structures of a range of early excitatory amino acid antagonists, with dates of first reports and receptor selectivities. 1, 1970-1; 2, 1976-7; 3, 1981-4; 4, 1988. a, quisqualate (AMPA); b, NMDA glycine site; c, NMDA glutamate site; d, NMDA glutamate site/quisqualate (AMPA)/kainate; e, NMDA glycine site/quisqualate(AMPA)/kainate. Reviewed by Watkins and Evans, 1981; Watkins, Krogsgaard-Larsen and Honoré, 1990; Jane et al., 1994.

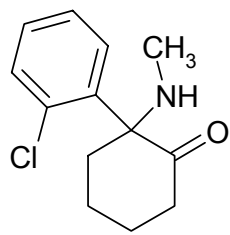

Ketamine<sup>1</sup>

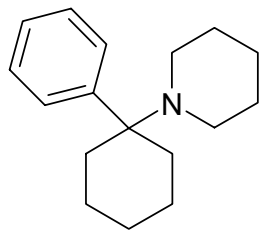

Phencyclidine (PCP)<sup>1</sup>

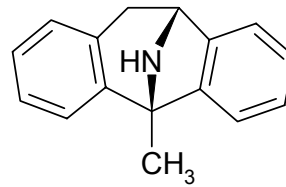

MK-801<sup>2</sup>

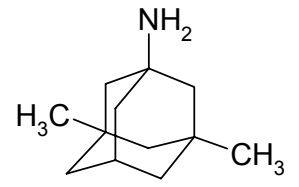

Memantine<sup>3</sup>

Fig 3. Structures of some early NMDA receptor ion channel blockers, with dates of first reports. 1, 1982-3; 2, 1986; 3, 1992. Reviewed by Lodge et al., 1994; Kew and Kemp, 2005.

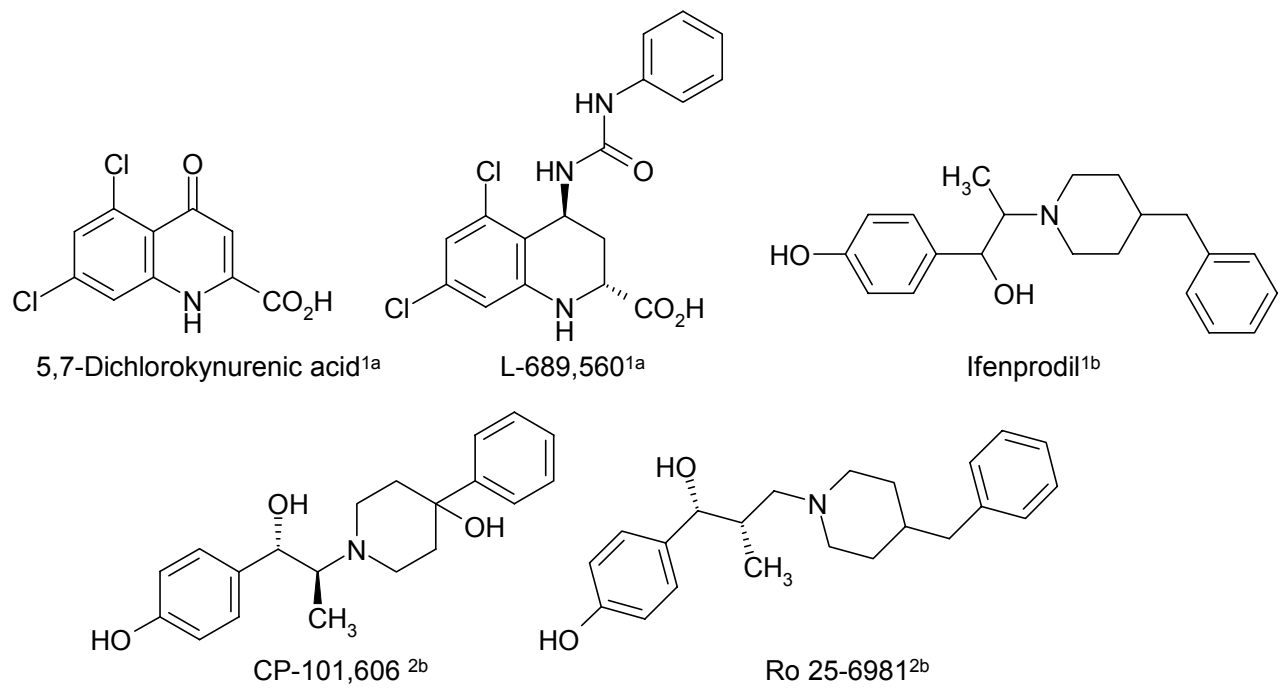

Fig 4. Structures of some NMDA receptor glycine (a) and polyamine site antagonists (b), with dates of first reports. 1, 1989-1992; 2, 1998. Reviews by Leeson and Iverson, 1994; Monaghan et al, 2004.

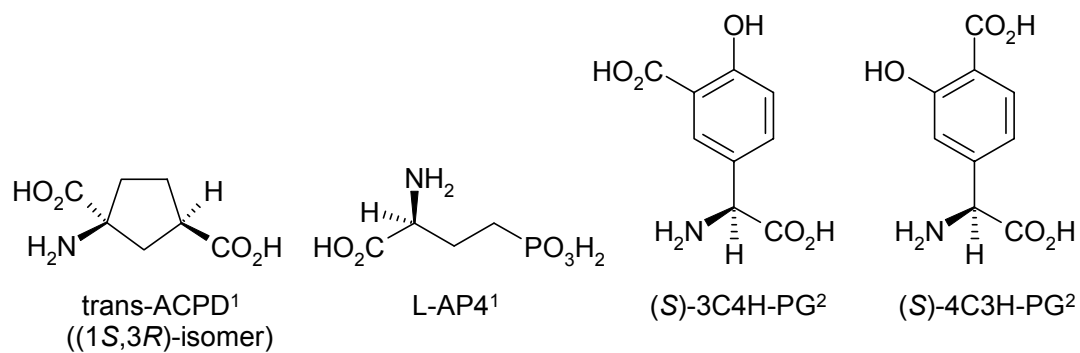

Fig 5. Structures of compounds useful in early identification of metabotropic glutamate receptors, with dates of first reports. 1, 1979-82; 2, 1987; 3, 1992. Reviewed by Monaghan et al., 1989; Watkins and Collingridge, 1994; Schoepp et al., 1999.

## A. NMDA receptor

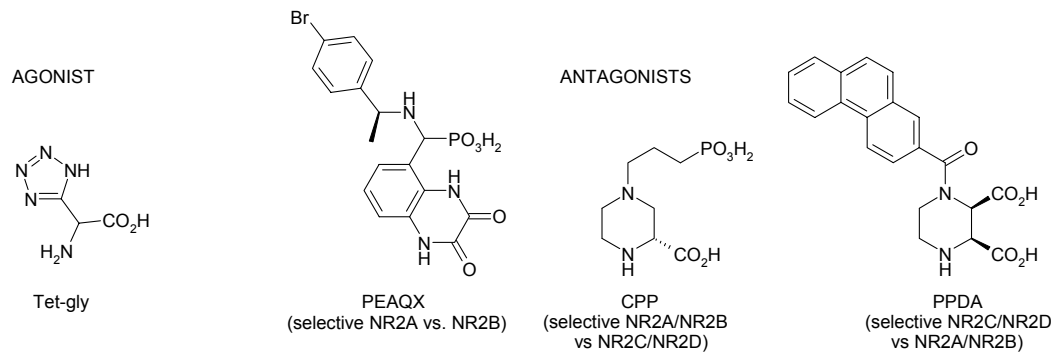

## B. AMPA receptor

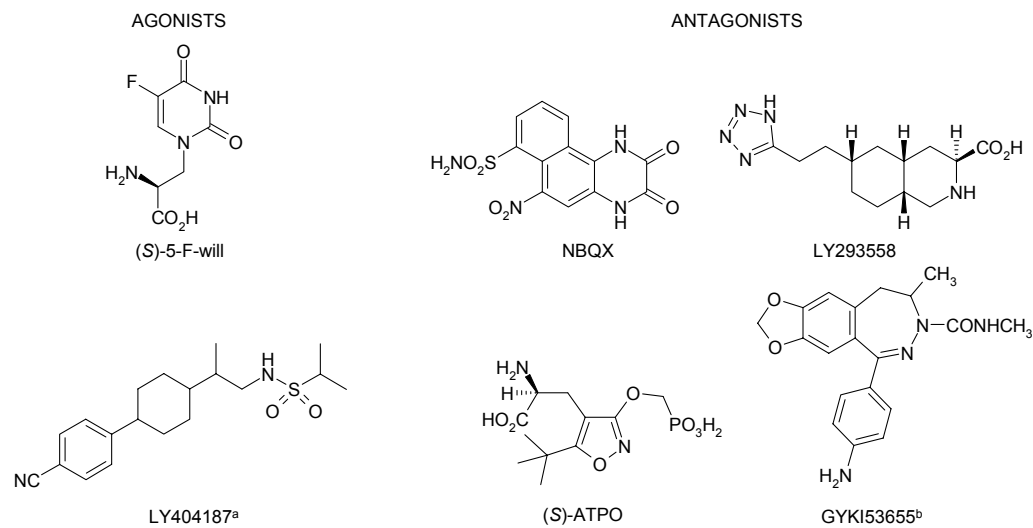

<sup>a</sup> Positive allosteric modulator    <sup>b</sup> Negative allosteric modulator

## C. Kainate receptor

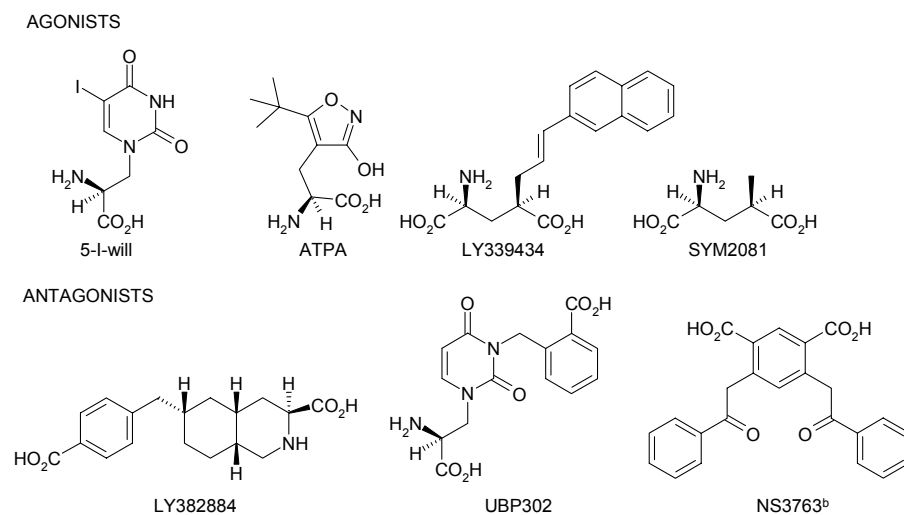

<sup>b</sup> Negative allosteric modulator

Fig 6. Selective agonists and antagonists for NMDA, AMPA, and kainate ionotropic glutamate receptors.

## GROUP I mGlu receptors

### AGONISTS

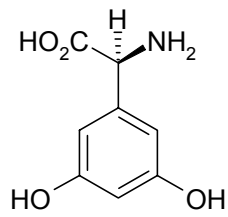

(S)-DHPG

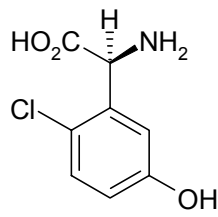

CHPG  
(mGlu5)

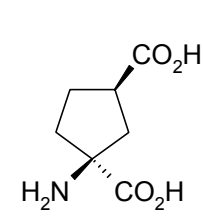

(1S,3R)-ACPD

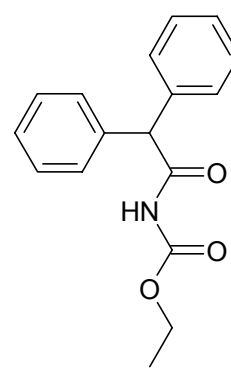

Ro 01-6128<sup>a</sup>  
(mGlu1)

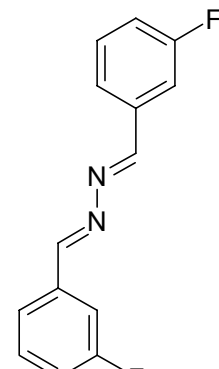

DFB<sup>a</sup>  
(mGlu5)

<sup>a</sup> Positive allosteric modulator

### ANTAGONISTS

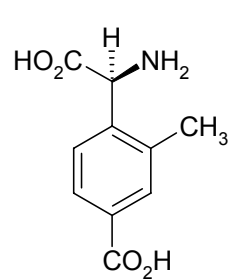

LY367385 (mGlu1)

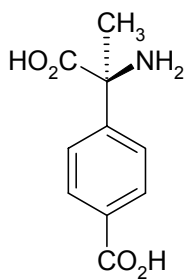

(S)-MCPG

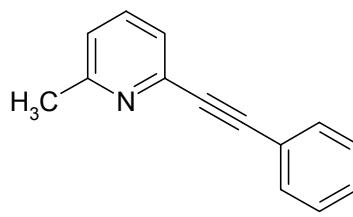

MPEP<sup>b</sup>  
(mGlu5)

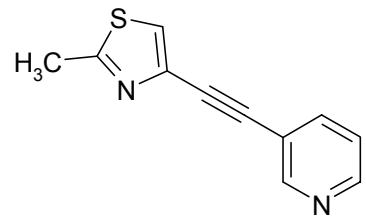

MTEP<sup>b</sup>  
(mGlu5)

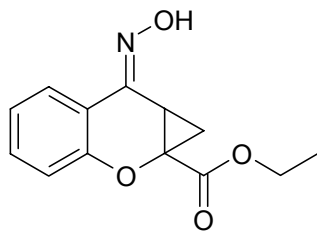

CPCCOEt<sup>b</sup>  
(mGlu1)

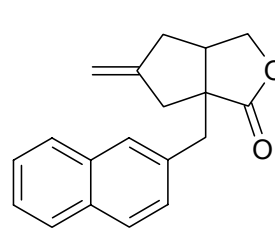

BAY36-7620<sup>b</sup>  
(mGlu1)

<sup>b</sup> negative allosteric modulator

Fig 7. Selective agonists and antagonists for group I metabotropic glutamate receptors.



## GROUP II mGlu receptors

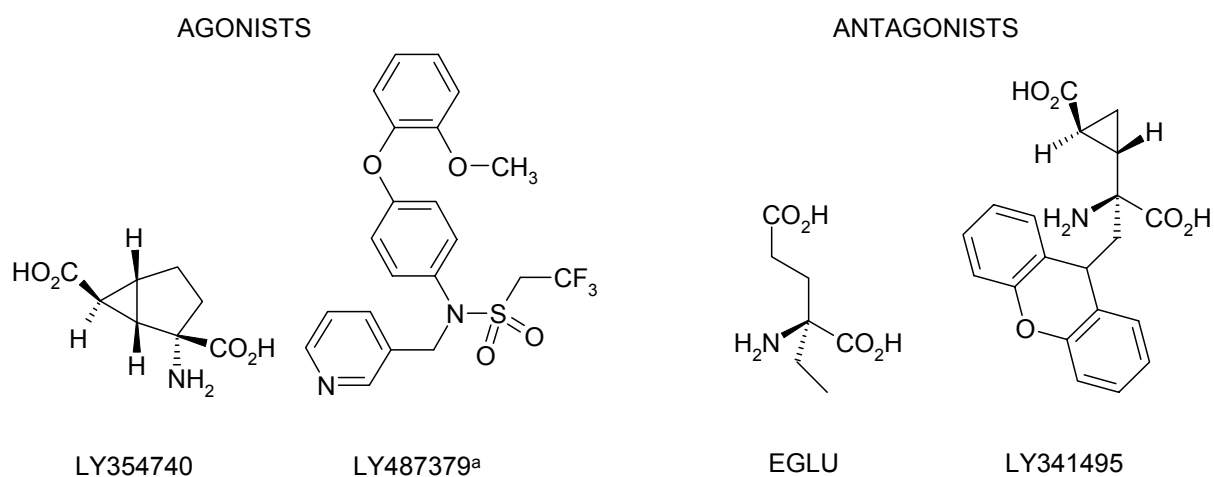

<sup>a</sup> Positive allosteric modulator

## GROUP III mGlu receptors

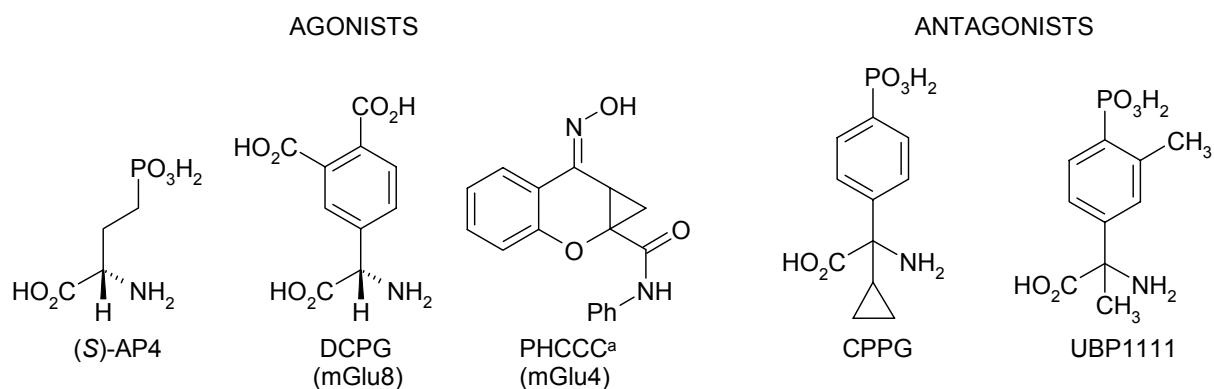

<sup>a</sup> Positive allosteric modulator of mGlu4 and negative allosteric modulator of mGlu1

Fig 8. Selective agonists and antagonists for group II and III metabotropic glutamate receptors.

## References

CURTIS, D.R. & JOHNSTON, G.A.R. (1974). Amino acid transmitters in the mammalian central nervous system. *Ergebn. Physiol.*, **69**, 97-188.

CURTIS, D.R. & WATKINS, J.C. (1965). The pharmacology of amino acids related to gamma-aminobutyric acid. *Pharm. Rev.*, **17**, 347-391.

- JANE, D.E.; OLVERMAN, H.J. & WATKINS, J.C. (1994). Agonists and competitive antagonists: structure-activity and molecular modelling studies. In *The NMDA Receptor, 2<sup>nd</sup> Edition*. eds. Collingridge, G.L. & Watkins, J.C. pp. 31-104. Oxford University Press.
- KEW, J.N.C. & KEMP, J.A. (2005). Ionotropic and metabotropic glutamate receptor structure and pharmacology. *Psychopharmacology*, **179**, 4-29.
- LEESON, P.D. & IVERSEN, L.L. (1994). The glycine site on the NMDA receptor: structure-activity relationships and therapeutic potential. *J. Med. Chem.*, **37**, 4053-4067.
- LODGE, D.; JONES, M. & FLETCHER, E. (1994). Non-competitive antagonists of N-methyl-D-aspartate. In *The NMDA Receptor, 2<sup>nd</sup> Edition*. eds. Collingridge, G.L. & Watkins, J.C. pp. 105-131. Oxford University Press.
- MONAGHAN, D.T., BRIDGES, R.J. & COTMAN, C.W. (1989). The excitatory amino acid receptors: their classes, pharmacology and distinct properties in the function of the central nervous system. *Ann. Rev. Pharmacol. Toxicol.*, **29**, 365-402.
- MONAGHAN, D.T.; MORE, J.C.A.; FENG, B. & JANE, D.E. (2004). Glutamate receptors. In *Dopamine and Glutamate in Psychiatric Disorders*. eds. Smith W.J. & Smith, M.E.A. pp.79-116. Totawa, N.J.: Humana Press inc.
- SCHOEPP, D.D.; JANE, D.E. & MONN, J.A. (1999). Pharmacological agents acting at subtypes of metabotropic glutamate receptors. *Neuropharmacology*, **38**, 1431-1476.
- WATKINS, J.C. & COLLINGRIDGE, G.L. (1994). Phenylglycine derivatives as antagonists of metabotropic glutamate receptors. *Trends in Pharmacol. Sci.*, **15**, 333-342.
- WATKINS, J.C. & EVANS, R.H. (1981) Excitatory Amino Acid Transmitters. *Ann. Rev. Pharmacol. Toxicol.*, **21**, 165-204.
- WATKINS, J.C.; KROGSGAARD-LARSEN, P. & HONORÉ, T. (1990). Structure-activity relationships in the development of excitatory amino acid receptor agonists and competitive antagonists. *Trends in Pharmacol. Sci.*, **11**, 25-33.
